# Supplementary material for: Strong downdrafts preceding rapid tropopause ascent and their potential to identify cross-tropopause stratospheric intrusions
Source: Copernicus journal article supplement (doi:10.5194/angeo-2018-78), 2018-07-11
Supplement: Supplementary file [file angeo-2018-78-AC2-supplement.pdf]

1           **Strong downdrafts preceding rapid tropopause ascent and their potential to**  
2                           **identify cross-tropopause stratospheric intrusions**

3           Feilong Chen<sup>1</sup>, Gang Chen<sup>1\*</sup>, Chunhua Shi<sup>2</sup>, Yufang Tian<sup>3</sup>, Shaodong Zhang<sup>1</sup>,

4                                                   Kaiming Huang<sup>1</sup>

5           <sup>1</sup>School of Electronic Information, Wuhan University, Wuhan 430072, China.

6           <sup>2</sup>Key Laboratory of Meteorological Disaster, Ministry of Education, Nanjing  
7           University of Information Science & Technology, Nanjing 210044, China.

8           <sup>3</sup>Key Laboratory of Middle Atmosphere and Global Environment Observation,  
9           Institute of Atmospheric Physics, Chinese Academy of Sciences, Beijing 100029,  
10          China

11          \*Corresponding author: Gang Chen (g.chen@whu.edu.cn)

13          **Abstract:**

14          The capability of measuring 3-dimensional wind and tropopause structure with  
15          relatively high time and vertical resolution makes VHF radar a potentially significant  
16          tool for studying various processes of the atmosphere. Here the potential detection of  
17          stratospheric intrusion events is discussed using the Beijing MST radar located at  
18          Xianghe (39.75°N, 116.96°E). During the passage of a cut-off low in late November  
19          2014, a deep V-shaped tropopause structure, and strong downdrafts (>0.8 m/s)  
20          immediately preceding the rapid tropopause ascent (>0.2 km/h) were observed. Within  
21          the height region of the downdrafts, the ‘normal’ radar-tropopause layer seems to be  
22          weakened. Analysis results from global reanalysis and the satellite data, as well as the

23 trajectory model have shown the clear evidence of the downward stratospheric  
24 intrusions (dry ozone-rich and depleted methane air) associated with the strong  
25 downdrafts. According to the previous studies and the present case observation, the  
26 strong downdrafts preceding rapid tropopause ascent are considered as a significant  
27 signature of stratospheric intrusions. Twenty typical cases of such strong downdrafts,  
28 occurring during various synoptic processes in different seasons, have been presented  
29 and 16 of them are exactly associated with some form of stratospheric intrusions. Four  
30 years (2012-2015) of such downdrafts are further discussed. The observations reveal  
31 that the strong downdrafts preceding the rapid tropopause ascent can be a valuable  
32 diagnostic for monitoring intrusion events, which will gain a better understanding of  
33 stratospheric intrusions in VHF radar observations.

34

35 **Keywords:** Stratospheric intrusions; strong downdrafts; rapid tropopause ascent; MST  
36 radar; VHF radar; cut-off low

37

## 38 1. Introduction

39 The tropopause is a stable transition zone separating the vertically stable stratified  
40 stratosphere from the active free troposphere. The stratospheric and tropospheric air are  
41 remarkably different in their chemical and dynamical characteristics. The stratosphere  
42 is dominantly high in ozone and potential vorticity (PV) content and low in water vapor  
43 (WV) and methane (CH<sub>4</sub>) concentration, while the troposphere is just on the contrary  
44 (Holton et al., 1995). Consequently, the natural stable tropopause layer, characterized  
45 by strong gradients of trace constituents and wind speeds, plays an important role in  
46 stratosphere-troposphere exchange (STE) processes. In other words, the layer is a  
47 significant barrier for the atmospheric transport between stratosphere and troposphere  
48 (Mahlman, 1997). From a point of view, the long-term seasonal variation of the  
49 tropopause height determines the seasonal variation of the flux of stratospheric air into  
50 the free troposphere (Appenzeller et al., 1996). Under the global climate warming (e.g.  
51 the continuing rise in CO<sub>2</sub>), the tropopause variation is also a significant factor that  
52 must be considered **with regards** to the recovery of the stratospheric ozone (Butchart et  
53 al., 2010; Chipperfield et al., 2017). On the other hand, the short-term tropopause  
54 variability is sensitive to various meso- and small-scale atmospheric processes, during  
55 which the folding/intrusion events commonly occur. This characteristic of the  
56 tropopause change are sometimes directly used to detect the tropopause folds (e.g. Rao  
57 et al., 2008; Alexander et al., 2012, and references therein), but are less, if any, directly  
58 used to identify stratospheric intrusions. More detailed analysis of the variability of  
59 high-resolution tropopause height and of course some other parameters (e.g. 3-

60 dimensional wind), and how the stratospheric air is transported across the tropopause  
61 into the troposphere will help us to yield better understanding of the downward  
62 stratospheric intrusions (e.g. Sprenger et al., 2003; Leclair de Bellevue et al., 2007; Das  
63 et al., 2016).

64 Although photochemical production within the troposphere is the main source of  
65 tropospheric ozone, the influence of the downward stratospheric intrusions on the  
66 tropospheric ozone content cannot be ignored (Oltmans and Levy II, 1992; Monks,  
67 2000; Stevenson et al., 2006). Stratospheric intrusions bring dry ozone-rich air down  
68 into the free troposphere (e.g. Stohl et al., 2000; Sørensen and Nielsen, 2001) and  
69 sometimes even deep to the surface (e.g. Gerasopoulos et al., 2006; Ding and Wang,  
70 2006; Lefohn et al., 2011). By now, it is well established that these intrusions of  
71 stratospheric origin will significantly influence other trace gases (such as hydroxyl  
72 (OH)) in the troposphere (Holton et al., 1995). These influences then will further  
73 contribute to the change of radiative balance (Ramaswamy et al., 1992) and play an  
74 important role in the radiative forcing of global climate change (Holton et al., 1995). It  
75 is true that stratospheric intrusion events occur all over the world and in any season.  
76 However, they are highly episodic in both vertical and isentropic (horizontal) directions  
77 (Chen, 1995). Various dynamical and physical processes have been proposed to be  
78 responsible for extra-tropical intrusion events. These mainly include tropopause folds,  
79 stratospheric streamers and break-up, cut-off lows (COLs), wave breaking, and  
80 mesoscale convective activities and thunderstorms (Stohl et al., 2003).

81 The certain dynamical and chemical characteristics of stratospheric air allow the

82 tracers, such as dry ozone-rich and high PV, to be proper indicators for the intrusions  
83 penetrating down into the troposphere. Various methods are available to detect intrusion  
84 events based on these tracers. Among them, balloon-borne ozonesonde sounding are  
85 without doubt one of the most appropriate tools, but is limited by coverage (He et al.,  
86 2011) and not possible to obtain continuous profiles with fine temporal resolution. In  
87 contrast, the satellite-borne remote sensing instruments, such as Atmospheric Infrared  
88 Sounder (AIRS), can provide nearly global coverage of various trace gases but have  
89 limitations in vertical and temporal resolution. Another method for studying transport  
90 processes is trajectory model, from which the backward trajectories can provide  
91 valuable information on the possible sources of the trace gases (e.g. Elbern et al., 1997).

92 By far, large-scale STE has been widely studied and is fairly well understood, but  
93 the details of small scale intrusions still remain uncertain (Holton et al., 1995). Kumar  
94 and Uma (2009) reported that the dearth of direct vertical wind measurements in the  
95 vicinity of the tropopause may be responsible for the lack of detailed fine observations  
96 of smaller scale intrusions.

97 Very-High-Frequency (VHF) radars, compared to the tools mentioned above, are  
98 capable to provide 3-dimensional wind and tropopause height continuously with both  
99 high temporal and spatial resolution and can operate unmanned continuously for 24  
100 hours per day under any weather conditions. During the past two decades, VHF radar  
101 measurements were commonly used to assist to study the stratospheric intrusions.  
102 However, it still remains uncertain in many aspects when using only the VHF radar to  
103 identify intrusion events. Complicated and changeable atmospheric processes make it

104 difficult to identify the intrusion events by only radar data. The research by Hocking et  
105 al., (2007) have achieved a development in this issue. They found that the rapid ascent  
106 in radar tropopause altitude ( $>0.2$  km/h) can be a valuable diagnostic for possible  
107 stratospheric intrusions and the RT height started to ascent when the stratospheric air  
108 just intruded across the tropopause layer. However, it does not always work (e.g. He et  
109 al., 2011) and remains uncertain when purely using the information of radar-determined  
110 tropopause.

111 The central objective of the present study is to discuss the signature of downward  
112 cross-tropopause intrusions using both the measurements of tropopause height and  
113 vertical wind by the Beijing MST radar. This study is carried out mainly via a detailed  
114 case observation during the passage of a COL and other general cases associated with  
115 various atmospheric processes. Our discussion mainly focused on the potential of the  
116 MST radar data to identify possible intrusion events, which is the main point of this  
117 paper. In section 2 the datasets used in this paper are described, section 3 presents  
118 detailed results and discussion, and section 4 gives the conclusions.

119

## 120 2. Dataset

### 121 2.1. MST radar data and tropopause detection

122 The Beijing MST radar located at Xianghe, China (39.75° N, 116.96° E, 22 m  
123 above sea level) is a VHF radar operated at 50 MHz and installed in 2010 based on the  
124 first phase of Chinese Meridian Space Weather Monitoring Project (Chinese Meridian  
125 Project for short) (Wang, 2010). The radar antenna array consists of 24×24 three-  
126 element Yagi to produce an average power aperture product of 3.2×10<sup>8</sup> Wm<sup>2</sup> and  
127 maximum directive gain of 34.8 dB. It operates radiation pattern with 172 kW peak  
128 power and 3.2° half-power beam width. More detailed information of the radar system  
129 can be found in Chen et al. (2016). Routine low mode data were used for present study  
130 with 0.5 h time resolution and 1 μs coded pulse, which provides 150 m vertical  
131 resolution. Details of the low mode setup used in this study are given in Table 1.

132 It has long been known that VHF radar reflectivity is proportional to the mean  
133 generalized refractive index gradient  $M$ , which is a function of humidity variation and  
134 static stability and given by (Ottersten, 1969) as follows

$$135 \quad M = -77.6 \times 10^{-6} (p/T) (d \ln \theta / dz) \\ 136 \quad \cdot \{ 1 + 15500 q / T [ 1 - (d \ln q / dz) / (2 d \ln \theta / dz) ] \} \quad (1)$$

137 where  $p$  is the atmospheric pressure (hPa)  $T$  is the temperature (K),  $\theta$  is the potential  
138 temperature (K) and  $q$  is the specific humidity (gg<sup>-1</sup>). According to the second and third  
139 terms of the equation (1): large humidity variation contributes to the echo from the  
140 lower and middle troposphere. From the first term: the radar backscatter power is  
141 proportional to the static stability, which in fact is directly proportional to the potential

142 temperature gradient. The tropopause, near which a strong potential temperature  
143 gradient exists, will lead to strong radar echoes in vertical incidence, as well as large  
144 radar aspect sensitivity (as shown in Figure 1). Radiosonde data used in this paper were  
145 received from the GTS1 type digital radiosonde launched from Beijing Meteorological  
146 Observatory (39.93 °N, 116.28 °E, station number 54511), which is less than 45 km  
147 away from the MST radar site. The black line in Fig.1 denotes the lapse-rate tropopause  
148 (LRT) defined using the temperature lapse rate (World Meteorological Organization  
149 (WMO), 1986). Applying the characteristic (enhanced radar echoes due to partial  
150 specular reflection) mentioned above, the tropopause can be detected and its height  
151 determined by VHF radars (Gage and Green, 1979). It has received widespread  
152 application around the world, either in middle latitudes (e.g. Hocking et al., 2007), polar  
153 regions (e.g. Alexander et al., 2012), and tropical regions (e.g. Yamamoto et al., 2003;  
154 Das et al., 2008). Here, the radar-determined tropopause (RT) height is defined as the  
155 height (above 500 hPa) where the maximum vertical gradient of echo power located  
156 (shown as the orange circle in Figure 1a). This definition of RT is similar to that in the  
157 studies of Alexander et al., 2012 and Ravindrababu et al., 2014.

158 In the present study, the MST radar mainly provides continuous measurements of  
159 backscattered echo power, 3-D wind, and RT height with time resolution of 0.5 hour. In  
160 addition, the radar aspect sensitivity, expressed as the ratio between vertical ( $p_v$ ) and  
161 oblique ( $p_o$ ) beam echo power, is mainly caused by the horizontally stratified  
162 anisotropic stable air and thus will be used as potential signature of stratospheric  
163 intrusions in the troposphere (e.g. Kim et al., 2001). The backscattered echo power



164 given here is expressed as relative power in decibels (dB). In order to reduce the random  
165 noise, the profile of  $p_v$  is smoothed by a 3-point running mean in altitude. Note that  
166 the data that are heavily contaminated will be eliminated from our datasets. The data of  
167 Dec. 2015 and Sep. 2015 are excluded.

## 168 2.2. AIRS satellite data

169 The AIRS instrument on NASA Aqua/EOS polar orbit satellite is a 2378 channel  
170 nadir cross-track scanning infrared spectrometer. It can provide profiles of a number of  
171 trace gases, including ozone and CH<sub>4</sub> (Susskind et al., 2003). The footprint of these  
172 retrieval data is of 45 km by 45 km and their most sensitive region is in an altitude range  
173 of 300-600 hPa. Many studies have shown that these AIRS retrieval constituents are  
174 useful indicators for detecting stratospheric intrusions. He et al. [2011] suggested that  
175 AIRS can observe the enhanced tropospheric ozone that is of stratospheric origin.  
176 Xiong et al. [2013] reported that AIRS is capable of observing abnormal depletion in  
177 CH<sub>4</sub> in the troposphere during intrusions. AIRS offers good latitude-longitude coverage.  
178 Here we use version 6 of the AIRS Level-3 ozone and methane retrieval products.

## 179 2.3. Meteorological reanalysis

180 European Centre for Medium-Range Weather Forecasts (ECMWF) reanalysis  
181 ERA-interim data are also used. After Nov. 2000 the data are based on the T511L60  
182 version available with a 6-h temporal resolution and  $3^\circ \times 3^\circ - 0.125^\circ \times 0.125^\circ$   
183 latitude-longitude grid. The dataset from 15 isentropic and 37 pressure levels  
184 **interpolated into**  $0.5^\circ \times 0.5^\circ$  grid are applied for present study.

## 185 2.4. HYSPLIT model

186 Backward (forward) trajectories in given starting locations are capable to  
187 reproduce the sources (destinations) of the air parcel that will allow us to examine the  
188 intrusions of stratospheric origin in the troposphere (e.g. Elbern et al., 1997). The  
189 Hybrid Single Particle Lagrangian Integrated Trajectory model (HYSPLIT) developed  
190 by the National Oceanic and Atmospheric Administration (NOAA)'s Air Resource  
191 Laboratory (ARL) (Rolph, 2003; Stein et al., 2016) is applied to calculate the backward  
192 and forward trajectories. The calculation method of the model is a hybrid between the  
193 Lagrangian approach and the Eulerian methodology. In this paper, Global Data  
194 Assimilation System (GDAS) datasets are adopted for driving the HYSPLIT.  
195

196 **3. Results and discussion**

197 3.1. Meteorological synoptic situation

198 On the morning of 29 November 2014, a 500-hPa trough developed on the western  
199 side of Lake Baikal (Western Siberia). The trough moved southeastward and extended  
200 equatorward and its southern tip separated from the westerlies in the afternoon of 30  
201 November 2014 (Fig. 2b), forming a COL near the radar site as shown by the closed  
202 geopotential contour. The black stars in Figure 1 and other figures indicate the location  
203 of the radar site. On the following days, the COL system moved northeastward  
204 gradually (Fig. 2b) and finally stayed over eastern Russia near Sakhalin Island until it  
205 reconnected and merged to the westerly flow. 315 K isentropic PV patterns have shown  
206 the coarse resolution features of intrusions from the polar reservoir across the  
207 tropopause into the midlatitude troposphere. The PV streamer curved and rolled up  
208 cyclonically along the western flank of the COL (Fig.2b).

209 Fig. 3 shows the time series of hourly surface meteorological parameters over the  
210 Beijing station. The data are obtained from the Chinese National Meteorology  
211 Information Center and is less than 50 km from the MST radar site. As the dry-cold air  
212 invasion accompanied with the COL travelled deeply into the planetary boundary layer,  
213 it brought severe weather to the surface, including a rapid decrease in temperature and  
214 humidity, and rapid increase in surface wind and sea level pressure. The humidity  
215 decreased from ~85 to 12 percent within less than 8 hours. It is well established that the  
216 polar-type COLs have strong potential to trigger deep convection (Price and Vaughan,  
217 1993). To examine the potential convection, maps of high quality Climate Data Record

218 (CDR) of daily Outgoing Longwave Radiation (OLR) are displayed in Fig. 4. During  
219 the development of the COL, a local region with abnormal low OLR value was clearly  
220 observed near the radar site on 29 Nov. (Fig. 4b). The Satellite-observed cloud top  
221 temperature also showed the low values corresponding to the low OLR (figure not  
222 shown), indicating **that** convection may be generated near radar side on 29 Nov.. Please  
223 note that we **did not** observe such low value either in OLR (Fig.4c, d) or in cloud top  
224 temperature near the radar side on 30 Nov. and 1 Dec.. The time for all the observations  
225 in this paper is **shown** in Universal Time (UTC) which is eight hours behind Beijing  
226 standard time (LT=UTC+8).

### 227 **3.2. MST radar observations**

228 Radar echo power, horizontal wind vector, vertical wind, and radar aspect  
229 sensitivity are plotted in Figure 5 as function of height and time during the passage of  
230 the COL. Time variation of RT (black line) and LRT (black crosses) heights are also  
231 displayed. The RT height first experienced a rapid descent, and then increased rapidly,  
232 forming a deep V-shaped structure of ~4 km depth. The vertical velocity of the RT  
233 height variation (both the rapid descent and ascent branches) reaches up to 0.28 km/h.  
234 The rapid RT variation in altitude is in fact the response of the tropopause fold below  
235 the jet stream, which will be well represented in Fig. 8a. Rapid variation in RT height  
236 remained a region with low echo power (marked by R on Fig. 5a) and low aspect  
237 sensitivity (marked by R' on Fig. 5d) where they should be normally high value within  
238 the 'normal' tropopause layer. Unlike the RT height, the radiosonde LRT altitudes are  
239 nearly constant during the COL passage. In normal conditions, RT agrees well with the

240 LRT altitude, such as indicated by Fig. 6a. However, large differences, of order of 2.5  
241 km (as shown in Fig.6b at 12 UTC 30 Nov.), are observed between LRT and RT in  
242 altitude during the passage of the COL as expected. It is the difference in definition that  
243 contribute most to the large differences, especially under the tropopause fold conditions.  
244 It is worth noting that, in Fig.6b, although there is no clear reversion in the radiosonde  
245 temperature profile within the height of RT, the RT height exactly corresponds well to  
246 the reversion of zonal and meridional wind and potential temperature gradient. Such  
247 differences between RT and LRT heights can commonly be observed, especially during  
248 extreme synoptic situations such as cyclone (e.g. Alexander et al., 2012).

249 The most important observation in this detailed case experiment is the strong  
250 downdrafts (hereinafter inferred to as main downdrafts) observed immediately  
251 preceding the rapid RT ascent (Fig.5c). The radar echo power sharply weakened (dotted  
252 rectangle in Fig.5a) and the wind direction changed rapidly (Fig.5b, change from  
253 dominant southerly wind to dominant northerly jet) within the height region of the main  
254 downdrafts. As mentioned previously, abnormal low value in OLR and cloud top  
255 temperature indicates the possible occurrence of convective activity on 29 Nov., but  
256 nothing special appeared on 30 Nov. near radar site. Consequently, we preliminarily  
257 consider that the main downdrafts occurred near 07 UT 30 November might not be  
258 produced directly by convective activity. Here, the accurate origin of the main  
259 downdrafts will not be discussed in detail, and it is also beyond the scope of present  
260 study.

261 The research by Hocking et al. (2007) has suggested that the rapid RT ascent ( $>0.2$

262 km h<sup>-1</sup>) can be a valuable indicator for the occurrence of stratospheric intrusions. Here  
263 in this paper, the main downdrafts preceding the rapid RT ascent observed by the  
264 Beijing MST radar are thus suspected to be an important feature or response of some  
265 form of vertical stratospheric intrusions. Firstly, as the tropopause descends (folded  
266 downward), it will displace stratospheric air into the troposphere (e.g. Hoskins et al.,  
267 1985). Secondly, the main downdrafts will act as an effective way to weaken the  
268 tropopause by means of continuously **impinging** on the tropopause, through which the  
269 stratospheric air is permitted to penetrate down into the free troposphere (e.g.  
270 Hirschberg and Fritsch, 1993; Kumar, 2006). In addition, after the main downdrafts,  
271 the observed region near the upper troposphere with strong backscatter echoes (marked  
272 by Q) and especially with abnormal high aspect sensitivity (marked by Q') may also be  
273 a weak signature of the possible intrusions. In normal conditions in the upper-  
274 troposphere, they are usually low in value (such as the region marked by P and P'). As  
275 we mentioned before, the large value in radar aspect sensitivity is mainly caused by  
276 reflection from stable atmospheric layer, such as the tropopause or lower-stratosphere.  
277 When stable stratospheric air intrudes into the troposphere and without mixing with the  
278 surrounding air mass, the intrusions in the free troposphere will be reflected as  
279 abnormal large aspect sensitivity. Further direct evidence of the relevant intrusions in  
280 dynamical and chemical aspects will be demonstrated in next section, using satellite  
281 AIRS and global reanalysis data.

### 282 3.3. Associated stratospheric intrusions

283 Due to the sensitivity of the AIRS retrieved ozone and CH<sub>4</sub> is between 300-600

284 hPa. Fig. 7 shows the 500 hPa distribution of AIRS observed ozone and CH<sub>4</sub>, along  
285 with the AIRS tropopause contour (defined based on the temperature lapse-rate). The  
286 ozone distribution maps (left panels of Fig. 7) clearly show a large area with enhanced  
287 tropospheric ozone (>80 ppbv) near the radar site during the passage of the COL.  
288 Moreover, severe CH<sub>4</sub> depletion (<1840 ppbv) was also observed (right panels in Fig.8).  
289 These features of the ozone enhancement, CH<sub>4</sub> depletion, and the corresponding low  
290 tropopause altitude clearly support the evidence of vertical downward cross-tropopause  
291 stratospheric intrusions on 30 Nov..

292 The vertical cross-section of ECMWF PV and specific humidity at 1800 UT 30  
293 November 2014 and the daily AIRS ozone on 30 November 2014, along a constant  
294 latitude 40° N, is shown in Fig. 8. The corresponding vertical structure of the  
295 stratospheric intrusions (dry ozone-rich and high PV along with low tropopause) over  
296 regions near radar side is clearly seen. The specific humidity tracer displays less distinct  
297 structure as compared with the other two tracers (similar as that shown by Vérémes et  
298 al., 2016). The cross-section of PV in Fig. 8a have demonstrated relatively finer-scale  
299 structure of the stratospheric PV intrusions (below the jet stream), which penetrated  
300 down deeply into ~650 hPa (~3.6 km).

301

### 302 3.4. Trajectory model analysis

303 Figure 9 shows 30h backward trajectories ending at the radar site at 18 UT 29  
304 November (left panel) and at 18 UT 30 November (right panel). As expected, the air  
305 masses parcel transported eastward horizontally before the occurrence of main

306 downdrafts (fig.10a). Whereas after the downdrafts, the trajectories clearly show that  
307 the tropospheric air masses over the radar site are of stratospheric origin from the  
308 western side of Lake Baikal. Trajectory results further support the evidence of  
309 stratospheric intrusions that closely related with the main downdrafts.

310 On the other hand, 30-h forward trajectories starting at 00 UT 30 November (left  
311 panel) and 00 UT 1 December (right panel) are shown in Fig. 10. It is interesting to note  
312 that, from Fig.11a before the passage of COL, the air parcels at 4 km transport rapidly  
313 upward (by more than 4 km within ~23 h) and northeastward to the upper-troposphere  
314 of East Siberian. This upward and poleward transportation is associated with a warm  
315 conveyor belt (**southerly flows dominate**) that is located ahead of the COL. It  
316 contributes to transporting the tropospheric moist and polluted air (such as aerosol) into  
317 the upper-troposphere and even the lower stratosphere (e.g. Stohl et al., 2003; Sandhya  
318 et al., 2015). After the downdrafts, forward trajectories in fig.11b demonstrate that the  
319 dry intrusion air parcels continue to be transported downward and southeastward to the  
320 boundary layer or even the surface.

### 321 3.5. Strong downdrafts preceding rapid tropopause ascent and discussion

322 Figure 11a shows another 20 typical cases **of** strong downdrafts preceding rapid  
323 RT ascent for the period Mar. 2012 and Jan. 2015 (shown placed end-to-end), the LRT  
324 height (plotted in crosses) and the vertical velocity of the RT (plotted in orange line) is  
325 also plotted. These cases (**marked by black rectangular boxes and labeled as S1, S2,**  
326 **S3..., and S20**) are identified based on the following criteria: 1) the amplitude of the  
327 RT ascent should exceed 0.6 km (four range gates), 2) vertical velocities of the RT



328 ascent excess 0.1 km/h, 3) the downdrafts occurred preceding the RT ascent **should >0.5**  
329 m/s, and the height region of the downdrafts should pass through the RT layer. The  
330 criteria are put forward mainly to avoid the influence of the RT spikes. Figure 11b  
331 **shows the backward trajectories for the selected 9 cases.** Results show clear evidence  
332 of **downward intrusions** corresponding to the associated strong downdrafts. Their  
333 sources are mainly from West Siberia (western side of Lake Baikal), except for the case  
334 Tr5. Moreover, according to AIRS daily 500 hPa ozone distribution, **most of the cases**  
335 in Figure 11a (except for the cases S14, S15, S16, S17, S20) were **associated with**  
336 **significant ozone enhancement**, indicating intrusions of stratospheric origin (as shown  
337 in **Supplementary figure S1**). It is important to note that the RT excursion velocity of  
338 all the cases is not all above 0.2 km/h and some are lower than this value (**e.g. cases**  
339 **S16 and S18**). However, some form of stratospheric intrusions **was** exactly observed in  
340 **such cases** from both the trajectory and satellite results. Therefore, the threshold of  
341 vertical velocity of the RT **ascent** is set at 0.1 km/h, rather than 0.2 km/h (Hocking et  
342 al., 2007). Large differences between RT and LRT are also interesting to be noted on  
343 some occasions when the RT changes rapidly (such as the occasion near 14 Mar. 2012).

344 According to the meteorological chart, the synoptic situation of those cases  
345 identified in **Fig. 11a** are introduced. The **cases S1, S2, S8, S9, S10, and S11** seem to  
346 have a close relationship with COL development; **cases S3, S4, S5, S6, S7, S17, S18,**  
347 **and S19** seem associated with low or high **trough systems (at 500 hPa)**. The remaining  
348 cases seem not associated with any significant synoptic development. However, in  
349 terms of the distribution of isentropic PV (generally at 315K in winter and 330K in

350 summer), we found that the remaining cases S12, S13, S14, S15, S16, and S20 appear  
351 to be associated with some form of stratospheric streamers and their break-up within  
352 the previous 48h (not shown). Some cases (e.g. S1 and S2) that appear close on the  
353 same day were probably caused by the same system. The characteristics of the 20 cases,  
354 including background synoptic condition, vertical velocity of the RT ascent, and 500  
355 hPa ozone enhancement, have been summarized in Table 2.

356 In the light of present understanding, the strong downdrafts preceding the rapid  
357 RT ascent can serve as an important diagnostic for intrusion events, during various  
358 synoptic processes in any season. This characteristic will be of great use and play an  
359 important role in routine identification of stratospheric intrusions. Considering the  
360 duration of such downdrafts, a higher time resolution of radar observations will be more  
361 helpful. Present study has shown the duration of the majority downdrafts is generally  
362 within 1.5-3 hours. We consider, therefore, that the radar resolution should be best  
363 within 1h.

364 Although Hocking et al. (2007) have reported that the rapid tropopause ascent  
365 ( $>0.2$  km/h) alone can be a useful diagnostic for potential intrusion events. However,  
366 using only the information of RT heights might lead to non-negligible errors, as  
367 mentioned above in introduction and according to the observations in Fig. 11.  
368 Especially on occasions when the RT ascent is between 0.1-0.2 km/h but the  
369 corresponding true intrusions were observed, all such intrusion events will be neglected  
370 (maybe  $\sim 2$  per month, refer to Fig. 12a). Whereas on some occasions when the RT  
371 ascent exceeds 0.2 km/h, but without observing true intrusion events (e.g. He et al.,

372 2011), these events will be misdiagnosed (maybe ~13 per month, refer to Fig. 12b). In  
373 this sense, using the unique MST radar observations of both the RT height variability  
374 and the vertical wind as complementary signature for identifying possible intrusion  
375 events is very meaningful.

376 Figure 12 shows four years (2012-2015) of the events with rapid RT ascent (gray  
377 bands), and the events with strong downdrafts just preceding the rapid RT ascent (black  
378 bands). The identification criteria of such strong downdrafts are similar to that  
379 mentioned above and the events are classified according to different value of vertical  
380 velocity of the ascent. Among all the events with ascent velocity between 0.1-0.2 km/  
381 h, about one-quarter (approximate 2 per month, Fig. 12a) were observed with strong  
382 downdrafts preceding them. Whereas, as for the events with the ascent velocity  $>0.2$   
383 km/h, the proportion is about a half (approximate 10 per month, Fig. 12b). Here,  
384 according to the results above, the occurrence of the strong downdrafts just preceding  
385 the rapid RT ascent (black bands in Fig. 12) to a large degree represents the occurrence  
386 of possible intrusions. In this way, Fig. 12 indicates that the occurrence of possible  
387 intrusions exhibit distinct seasonal variations, with a maximum in winter and spring  
388 minimum in summer. This is because the meso- and small-scale atmospheric processes,  
389 such as cold air outbreaks, thunderstorms, and convective activities, are more active in  
390 winter and spring. They are important sources for downward stratospheric intrusions.

391

#### 392 4. Conclusions

393 Detailed case analysis of the cross-tropopause stratospheric intrusions was carried  
394 out during a COL. Global reanalysis, satellite data, and HYSPLIT trajectories all  
395 showed consistent evidences of dry ozone-rich, high PV, and depleted CH<sub>4</sub> air that have  
396 penetrated downward into the free troposphere. The key signature of the stratospheric  
397 intrusions in the Beijing MST radar observations is the strong downdrafts just preceding  
398 rapid RT ascent. The radar echo power decreased rapidly within the region of strong  
399 downdrafts, after which abnormal high aspect sensitivity was recorded in troposphere.  
400 Such high aspect sensitivity is served as another potential clue for the intrusions of  
401 stratospheric origin.

402 Based on the criteria mentioned in section 3.5, other 20 typical cases of strong  
403 downdrafts preceding the rapid RT ascent between Mar. 2012 and Jan. 2015 were  
404 presented. These events occurred during different synoptic processes in different  
405 seasons. **Yet, most of the cases (15 of them)** are associated with some form of intrusions  
406 observed by combination of **AIRS-retrieved** ozone and the HYSPLIT trajectory model.  
407 Our results show that the **radar-derived** tropopause height and vertical winds are strong  
408 complementary indicators to be used to infer the occurrence of the intrusions of  
409 stratospheric origin. This will be of great use and play an important role for the routine  
410 identification or prediction of intrusion events. However, the actual origin of the  
411 observed downdrafts preceding the rapid RT ascent is not addressed in this paper.  
412 Further combination observational experiments need to be conducted, especially  
413 combined using ozonesonde soundings, to quantitative analyze the effectiveness of

414 present identification criteria for possible intrusions.

415

416

417 **Acknowledgment**

418 The authors really appreciate Prof Shira Raveh-Rubin for reading and checking the  
419 manuscript, using the criterion in Raveh-Rubin, 2017. This work is funded by National  
420 Natural Science Foundation of China (NSFC grants No. 41722404 and 41474132). The  
421 authors would like to thanks the technical and scientific staff of Chinese Meridian Space  
422 Weather Monitoring Project (CMSWMP) for their support in conducting the  
423 experiment. The authors sincerely acknowledge the ECMWF, NASA, and NOAA Air  
424 Resources Laboratory (ARL) for providing global reanalysis, satellite trace gases, and  
425 HYSPLIT transport model, respectively. The MST radar data for this paper are  
426 available at Data Centre for Meridian Space Weather Monitoring Project  
427 (<http://159.226.22.74/>). The radiosonde data is available from  
428 <http://weather.uwyo.edu/upperair/sounding.html>.

429

430 **References**

- 431 Appenzeller, C., Holton, J. R., & Rosenlof, K. H.: Seasonal variation of mass transport  
432 across the tropopause. *Journal of Geophysical Research Atmospheres*, 101(D10),  
433 15071–15078, 1996.
- 434 Appenzeller, C., Davies, H. C., & Norton, W. A.: Fragmentation of stratospheric  
435 intrusions. *Journal of Geophysical Research Atmospheres*. 101(D1), 1435-1456,  
436 1996.
- 437 Alexander, S. P., Murphy, D. J., and Klekociuk, A. R.: High resolution VHF radar  
438 measurements of tropopause structure and variability at Davis, Antarctica (69° S,  
439 78° E). *Atmospheric Chemistry and Physics*, 13(12), 26173-26205, 2012.
- 440 Bonasoni, P., Evangelisti, F., Bonafe, U., Ravegnani, F., Calzolari, F., Stohl, A., Tositti  
441 L., Tubertini O., & Colombo, T.: Stratospheric ozone intrusion episodes recorded  
442 at Mt. Cimone during the VOTALP project: case studies. *Atmospheric*  
443 *Environment*, 34(9), 1355-1365, 2000.
- 444 Butchart, N., Cionni, I., Eyring, V., Shepherd, T. G., Waugh, D. W., & Akiyoshi, H.,  
445 et al.: Chemistry-climate model simulations of twenty-first century stratospheric  
446 climate and circulation changes. *Journal of Climate*, 23(20), 5349-5374, 2010.
- 447 Chipperfield, M. P., Bekki, S., Dhomse, S., Harris, N., Hassler, B., & Hossaini, R., et  
448 al.: Detecting recovery of the stratospheric ozone layer. *Nature*, 549(7671), 211-  
449 218, 2017.
- 450 Chen, P.: Isentropic cross-tropopause mass exchange in the extratropics. *Journal of*  
451 *Geophysical Research*, 16661-16673, 1995.

452 Chen, G., Cui, X., Chen, F., Zhao, Z., Wang, Y., Yao, Q., ... & Gong, W.: MST Radars  
453 of Chinese Meridian Project: System Description and Atmospheric Wind  
454 Measurement. *IEEE Transactions on Geoscience and Remote Sensing*, 54(8),  
455 4513-4523, 2016.

456 Das, S. S., A. R. Jain, K. K. Kumar, and D. Narayana Rao: Diurnal variability of the  
457 tropical tropopause: Significance of VHF radar measurements, *Radio Sci.*, 43,  
458 RS6003, doi:10.1029/2008RS003824, 2008.

459 Das, S. S., Ratnam, M. V., Uma, K. N., Patra, A. K., Subrahmanyam, K. V., Girach, I.  
460 A., Suneeth K. V. , Kumar K. K., & Ramkumar, G.: Stratospheric intrusion into  
461 the troposphere during the tropical cyclone Nilam (2012). *Quarterly Journal of the*  
462 *Royal Meteorological Society*, 142(698), 2168-2179, 2012.

463 Ding, A., and T. Wang: Influence of stratosphere-to-troposphere exchange on the  
464 seasonal cycle of surface ozone at Mount Waliguan in western China, *Geophysical*  
465 *Research Letters*, 33, L03803, doi.10.1029/ 2005GL024760, 2006.

466 Elbern, H., Kowol, J., Sládkovic, R., & Ebel, A.: Deep stratospheric intrusions: a  
467 statistical assessment with model guided analyses. *Atmospheric Environment*,  
468 31(19), 3207-3226, 2006.

469 Gage, K. S., & Green, J. L.: Tropopause detection by partial specular reflection with  
470 Very-High-Frequency radar. *Science*, 203(4386), 1238-40, 1979.

471 Gerasopoulos, E., Zanis, P., Papastefanou, C., Zerefos, C.S., Ioannidou, A., Wernli, H.:  
472 A complex case study of down to the surface intrusions of persistent stratospheric  
473 air over the Eastern Mediterranean. *Atmospheric Environment*, 40(22), 4113-4125,



474 2006.

475 He, H., Tarasick, D. W., Hocking, W. K., Careysmith, T. K., Rochon, Y. J., Zhang, J., ...  
476 & Bourqui, M. S.: Transport analysis of ozone enhancement in Southern Ontario  
477 during BAQS-Met. *Atmospheric Chemistry and Physics*, 11(6), 2569-2583, 2011.

478 Hocking, W. K., Careysmith, T., Tarasick, D. W., Argall, P. S., Strong, K., Rochon, Y.  
479 J., Zawadzki Irek & Taylor, P. A.: Detection of stratospheric ozone intrusions by  
480 windprofiler radars. *Nature*, 450(7167), 281-284, 2007.

481 Holton, J. R., P. H. Haynes, M. E. McIntyre, A. R. Douglass, R. B. Rood, and L. Pfister:  
482 Stratosphere-troposphere exchange, *Reviews of Geophysics*, 33(4), 403–439,  
483 doi:10.1029/95RG02097, 1995.

484 Hoskins B.J., McIntyre M.E., Robertson A.W.: On the use and significance of  
485 isentropic potential vorticity maps. *Q. J. R. Meteorol. Soc.* 111: 877–946. 1985.

486 Hirschberg, P. A., and J. M. Fritsch: A study of the development of extratropical  
487 cyclones with an analytic model. Part I: The effects of stratospheric structure,  
488 *Journal of the Atmospheric Sciences*, 50, 311 –327, doi:10.1175/1520-  
489 0469(1993)050<0311:ASOTDO>2.0.CO;2, 1993.

490 Kim, K. E., Jung, E. S., Campistron, B., & Heo, B. H.: A physical examination of  
491 tropopause height and stratospheric air intrusion: a case study. *Journal of the*  
492 *Meteorological Society of Japan*, 79(5), 1093-1103, 2001.

493 Kumar, K. K., & Uma, K. N.: High temporal resolution VHF radar observations of  
494 stratospheric air intrusions in to the upper troposphere during the passage of a  
495 mesoscale convective system over gadanki (13.5° n, 79.2° e). *Atmospheric*

496 Chemistry & Physics, 24(8), 14-17, 2009.

497 Kumar, K. K.: VHF radar observations of convectively generated gravity waves: Some  
498 new insights. *Geophysical Research Letters*, 33(1), doi:10.1029/2005GL024109,  
499 2006.

500 Leclair de Bellevue J, Baray JL, Baldy S, Ancellet G, Diab R, Ravetta F.: Simulations  
501 of stratospheric to tropospheric transport during the tropical cyclone Marlene  
502 event. *Atmospheric Environment*. **41**: 6510–6526, doi:  
503 10.1016/j.atmosenv.2007.04.040, 2007.

504 Lefohn, A. S., Wernli, H., Shadwick, D., Limbach, S., Oltmans, S. J., Shapiro, M.: The  
505 importance of stratospheric–tropospheric transport in affecting surface ozone  
506 concentrations in the western and northern tier of the United States. *Atmospheric  
507 Environment*, 45(28), 4845-4857, 2011.

508 Mahlman, J. D.: Dynamics of transport processes in the upper troposphere. *Science*,  
509 276(5315), 1079-1083, 1997.

510 Mihalikova, M., Kirkwood, S., Arnault, J., & Mikhaylova, D.: Observation of a  
511 tropopause fold by MARA VHF wind-profiler radar and ozonesonde at Wasa,  
512 Antarctica: comparison with ECMWF analysis and a WRF model simulation.  
513 *Annales Geophysicae*, 30(9), 1411-1421, 2012.

514 Monks, P. S.: A review of the observations and origins of the spring ozone maximum,  
515 *Atmospheric Environment*, 34, 3545–3561, 2000.

516 Nastrom, G. D., Green, J. L., Gage, K. S., & Peterson, M. R.: Tropopause folding and  
517 the variability of the tropopause height as seen by the flatland VHF radar. *Journal*

518 of Applied Meteorology, 28(12), 1271-1281, 1989.

519 Oltmans, S. J., and H. Levy II.: Seasonal cycle of surface ozone over the western North  
520 Atlantic, *Nature*, 358, 392–394, 1992.

521 Ottersten, H.: Mean vertical gradient of potential refractive index in turbulent mixing  
522 and radar detection of CAT, *Radio Science*, 4, 1247–1249,  
523 doi:10.1029/RS004i012p01247, 1969.

524 Price, J. D., & Vaughan, G.: The potential for stratosphere-troposphere exchange in cut-  
525 off-low systems. *Quarterly Journal of the Royal Meteorological Society*, 119(510),  
526 343-365, 1993.

527 Rao, T. N., and S. Kirkwood: Characteristics of tropopause folds over Arctic latitudes,  
528 *Journal of Geophysical Research*, 110, D18102, doi:10.1029/2004JD005374,  
529 2005.

530 Rao, T. N., Arvelius, J., & Kirkwood, S.: Climatology of tropopause folds over a  
531 european arctic station (esrange). *Journal of Geophysical Research Atmospheres*,  
532 113(D7), 762-770, 2008.

533 Ravindrababu, S., Venkat Ratnam, M., Sunilkumar, S. V., Parameswaran, K., and  
534 Krishna Murthy, B. V.: Detection of tropopause altitude using Indian MST radar  
535 data and comparison with simultaneous radiosonde observations. *Journal of*  
536 *Atmospheric and Solar-Terrestrial Physics*, 121(6), 679-687, 2014.

537 Ramaswamy V, Schwarzkopf MD, Shine KP.: Radiative forcing of climate from  
538 halocarbon-induced global stratospheric ozone loss. *Nature* **355**: 810–812, doi:  
539 10.1038/355810a0, 1992.

540 Rolph, G.D.: Real-time Environmental Applications and Display sYstem (READY)  
541 Website. NOAA Air Resources Laboratory, Silver Spring, MD. [http://](http://www.arl.noaa.gov/ready/hysplit4.html)  
542 [www.arl.noaa.gov/ready/hysplit4.html](http://www.arl.noaa.gov/ready/hysplit4.html), 2003.

543 Sandhya, M., Sridharan, S., & Indira Devi, M.: Tropical upper tropospheric humidity  
544 variations due to potential vorticity intrusions. *Annales Geophysicae*, 33(9), 1081-  
545 1089, 2015.

546 Skerlak, B., Sprenger, M., Pfahl, S., Tyrlis, E., & Wernli, H.: Tropopause folds in ERA-  
547 Interim: Global climatology and relation to extreme weather events. *Journal of*  
548 *Geophysical Research*, 120(10), 4860-4877, 2015.

549 Stohl, A., Bonasoni, P., Cristofanelli, P., Collins, W., Feichter, J., & Frank, A., et al.:  
550 Stratosphere-troposphere exchange: a review, and what we have learned from  
551 staccato. *Journal of Geophysical Research Atmospheres*, 108(D12), 469-474,  
552 2003.

553 Stohl, A., et al.: The influence of stratospheric intrusions on alpine ozone concentrations,  
554 *Atmospheric Environment*, 34, 1323– 1354, 2000.

555 Stohl, A., Wernli, H., James, P., Bourqui, M., Forster, C., & Liniger, M. A., et al.: A new  
556 perspective of stratosphere troposphere exchange. *Bulletin of the American*  
557 *Meteorological Society*, 84(11), 2003.

558 Stein, A. F., Draxler, R. R., Rolph, G. D., Stunder, B. J. B., Cohen, M. D., & Ngan, F.:  
559 Noaa's HYSPLIT atmospheric transport and dispersion modeling system. *Bulletin*  
560 *of the American Meteorological Society*, 96(12), 150504130527006, 2016.

561 Stevenson, D. S., Dentener, F. J., Schultz, M. G., Ellingsen, K., Noije, T. P. C. V., &

562 Wild, O., et al.: Multimodel ensemble simulations of present-day and near-future  
563 tropospheric ozone. *Journal of Geophysical Research Atmospheres*, 111(D8), 263-  
564 269, 2006.

565 Sørensen, J. H., and Nielsen, N. W.: Intrusion of stratospheric ozone to the free  
566 troposphere through tropopause folds -a case study. *Physics and Chemistry of the*  
567 *Earth Part B Hydrology Oceans and Atmosphere*, 26(10), 801-806, 2001.

568 Su, L., Yuan, Z., Fung, J. C., & Lau, A. K.: A comparison of HYSPLIT backward  
569 trajectories generated from two GDAS datasets. *Science of The Total Environment*,  
570 527-537, 2015.

571 Susskind, J., C. D. Barnett, and J. M. Blaisdell.: Retrieval of atmospheric and surface  
572 parameters from AIRS/AMSU/HSB data in the presence of clouds, *IEEE*  
573 *Transactions on Geoscience and Remote Sensing*, 41(2), 390–409,  
574 doi:10.1109/tgrs.2002.808236, 2003.

575 Vaughan, G., Gouget, H., O’Connor, F. M., & Wier, D.: Fine-scale layering on the edge  
576 of a stratospheric intrusion. *Atmospheric Environment*, 35(12), 2215–2221, 2001.

577 Vérémes, H., J.-P. Cammas, J.-L. Baray, P. Keckhut, C. Barthe, F. Posny, P. Tulet, D.  
578 Dionisi, and S. Bielli: Multiple subtropical stratospheric intrusions over Reunion  
579 Island: Observational, Lagrangian, and Eulerian numerical modeling approaches,  
580 *Journal of Geophysical Research Atmospheres*, 121, 14,414–14,432, doi:10.1002/  
581 2016JD025330, 2016.

582 Wang, C.: New Chains of Space Weather Monitoring Stations in China. *Space Weather-*  
583 *the International Journal of Research and Applications*, 8(8), 2010.

584 World Meteorological Organization (WMO): Atmospheric ozone 1985, WMO Global  
585 Ozone Res. and Monit. Proj. Rep. 20, Geneva, Switzerland, 1986.

586 Xiong, X., C. Barnet, E. Maddy, S. C. Wofsy, L. Chen, A. Karion, and C. Sweeney.:  
587 Detection of methane depletion associated with stratospheric intrusion by  
588 atmospheric infrared sounder (AIRS), *Geophysical Research Letters*, 40, 2455–  
589 2459, doi:10.1002/grl.50476, 2013.

590 Yamamoto, M., Oyamatsu, M., Horinouchi, T., Hashiguchi, H., & Fukao, S.: High time  
591 resolution determination of the tropical tropopause by the Equatorial Atmosphere  
592 Radar. *Geophysical Research Letters*, 30(21), 2003.

593

594 **Table**

| Radar parameter           | Value                |
|---------------------------|----------------------|
| Transmitted frequency     | 50 MHz               |
| Antenna array             | 24×24 3-element Yagi |
| Antenna gain              | 33 dB                |
| Transmitter peak power    | 172.8 kW             |
| Code                      | 16-bit complementary |
| No. coherent integrations | 128                  |
| No. FFT points            | 256                  |
| No. spectral average      | 10                   |
| Pulse repetition period   | 160 μs               |
| Half power beam width     | 3.2°                 |
| Pulse length              | 1 μs                 |
| Range resolution          | 150 m                |
| Temporal resolution       | 30 min               |
| Off-zenith angle          | 15°                  |

595 **Table 1.** Operating parameters in low-mode of the Beijing MST radar.

596

| Cases | Time<br>(year/month/day) | Background<br>condition | Vertical<br>velocity of RT<br>ascent | 500 hPa ozone<br>enhancement |
|-------|--------------------------|-------------------------|--------------------------------------|------------------------------|
| S1    | 2012/03/06               | Cut-off low             | >0.2 km/h                            | Enhanced                     |
| S2    | 2012/03/06               | Cut-off low             | >0.2 km/h                            | Enhanced                     |
| S3    | 2012/03/12               | Low/high trough         | >0.2 km/h                            | Enhanced                     |
| S4    | 2012/03/13               | Low/high trough         | >0.2 km/h                            | Enhanced                     |
| S5    | 2012/04/05               | Low/high trough         | >0.2 km/h                            | Enhanced                     |
| S6    | 2012/04/05               | Low/high trough         | >0.2 km/h                            | Enhanced                     |
| S7    | 2012/04/06               | Low/high trough         | >0.2 km/h                            | Enhanced                     |
| S8    | 2012/06/13               | Cut-off low             | >0.2 km/h                            | Enhanced                     |
| S9    | 2012/06/13               | Cut-off low             | >0.2 km/h                            | Enhanced                     |
| S10   | 2013/08/02               | Cut-off low             | >0.2 km/h                            | Enhanced                     |
| S11   | 2013/08/02               | Cut-off low             | >0.2 km/h                            | Enhanced                     |

|     |            |                 |              |          |
|-----|------------|-----------------|--------------|----------|
| S12 | 2013/08/03 | PV streamer     | >0.2 km/h    | Enhanced |
| S13 | 2013/08/03 | PV streamer     | >0.2 km/h    | Enhanced |
| S14 | 2014/01/02 | PV streamer     | >0.2 km/h    | None     |
| S15 | 2014/01/02 | PV streamer     | >0.2 km/h    | None     |
| S16 | 2014/01/03 | PV streamer     | 0.1-0.2 km/h | None     |
| S17 | 2014/01/04 | Low/high trough | >0.2 km/h    | None     |
| S18 | 2014/05/02 | Low/high trough | 0.1-0.2 km/h | Enhanced |
| S19 | 2014/05/02 | Low/high trough | >0.2 km/h    | Enhanced |
| S20 | 2015/01/03 | PV streamer     | >0.2 km/h    | None     |

597 **Table 2.** Characteristics of the 20 cases shown in Fig. 11a.

598



599 **Figures**

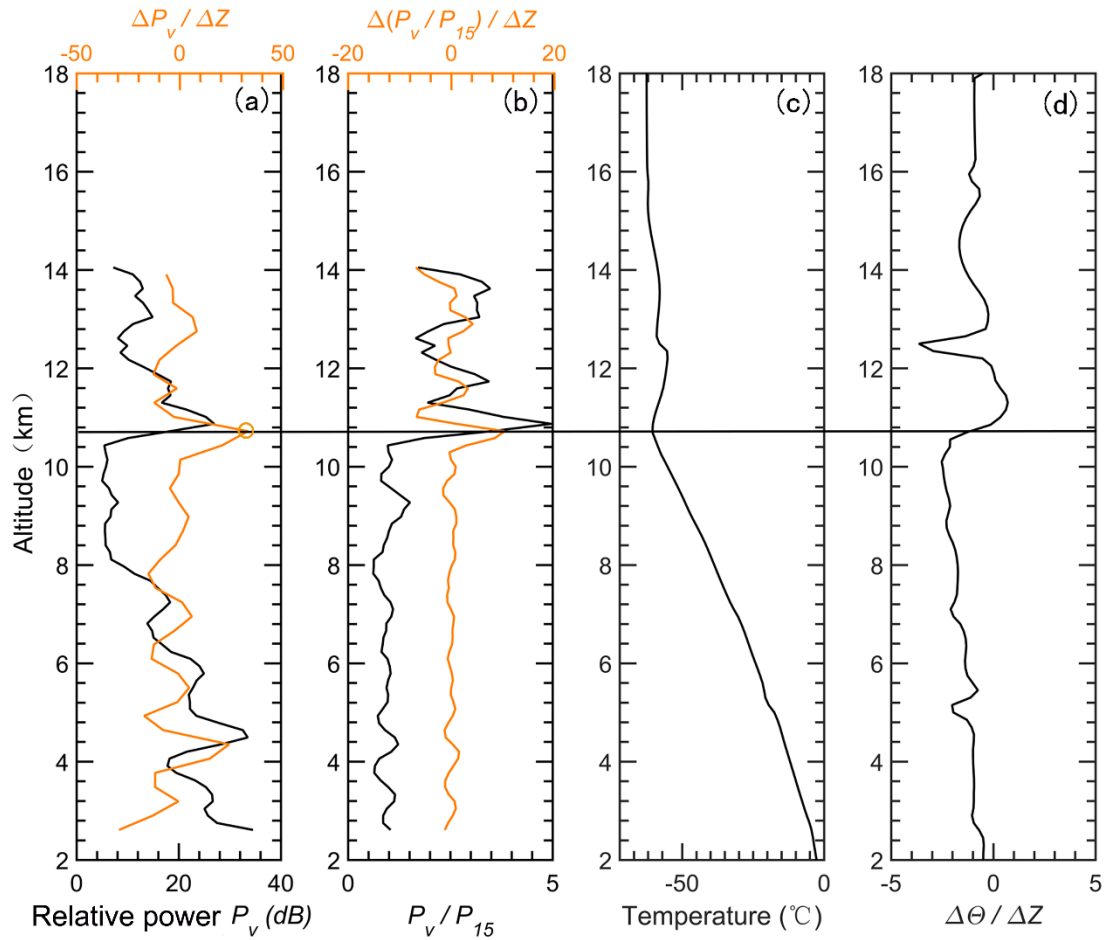

600

601 **Figure 1.** Example of the vertical height profiles of (a) the relative radar echo power  
 602 (black line, smoothed by a 3-point running mean) along with its gradient variation  
 603 (orange line), (b) the aspect sensitivity (black line, expressed as the ratio between the  
 604 vertical echo power and oblique echo power) along with its gradient variation (orange  
 605 line), observed on 12 UT 29 November 2014. The vertical profiles of simultaneous  
 606 radiosonde observed temperature and potential temperature gradient are shown in plots  
 607 (c) and (d). The black horizontal line denotes the LRT height derived from the  
 608 radiosonde temperature profile. The orange circle indicates the RT height derived from  
 609 the profile of the radar backscattered echo power.

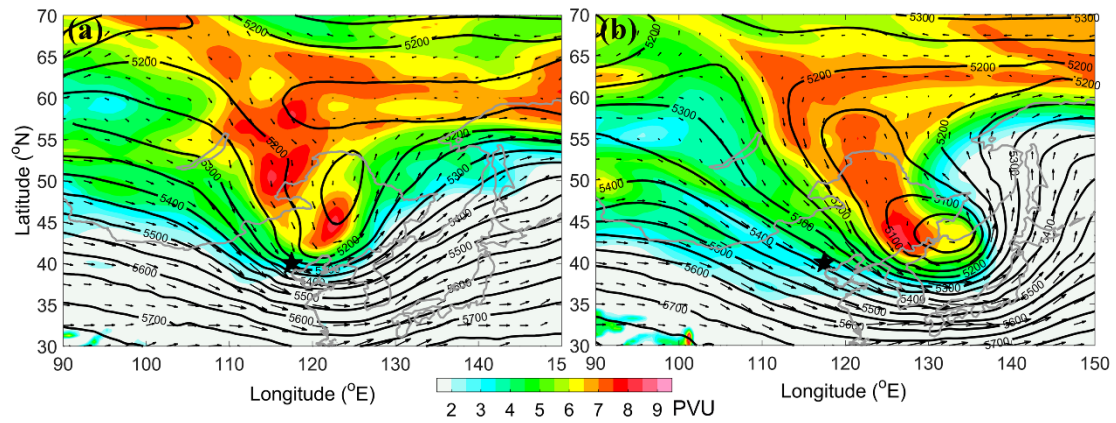

610

611 **Figure 2.** ECMWF derived isentropic PV map on 315 K surface (shaded above 2 pvu,

612  $1 \text{ PVU} = 10^{-6} \text{ m}^2 \text{ K kg}^{-1} \text{ s}^{-1}$ ) and geopotential height (contoured every 50 m in solid line)

613 along with the wind vector (arrow) at 500 hPa ( $\sim 5.5 \text{ km a.s.l.}$ ) on (a) 18 UTC 30

614 November 2014, (b) 12 UTC 1 December 2014. The black star shows the location of

615 Xianghe.

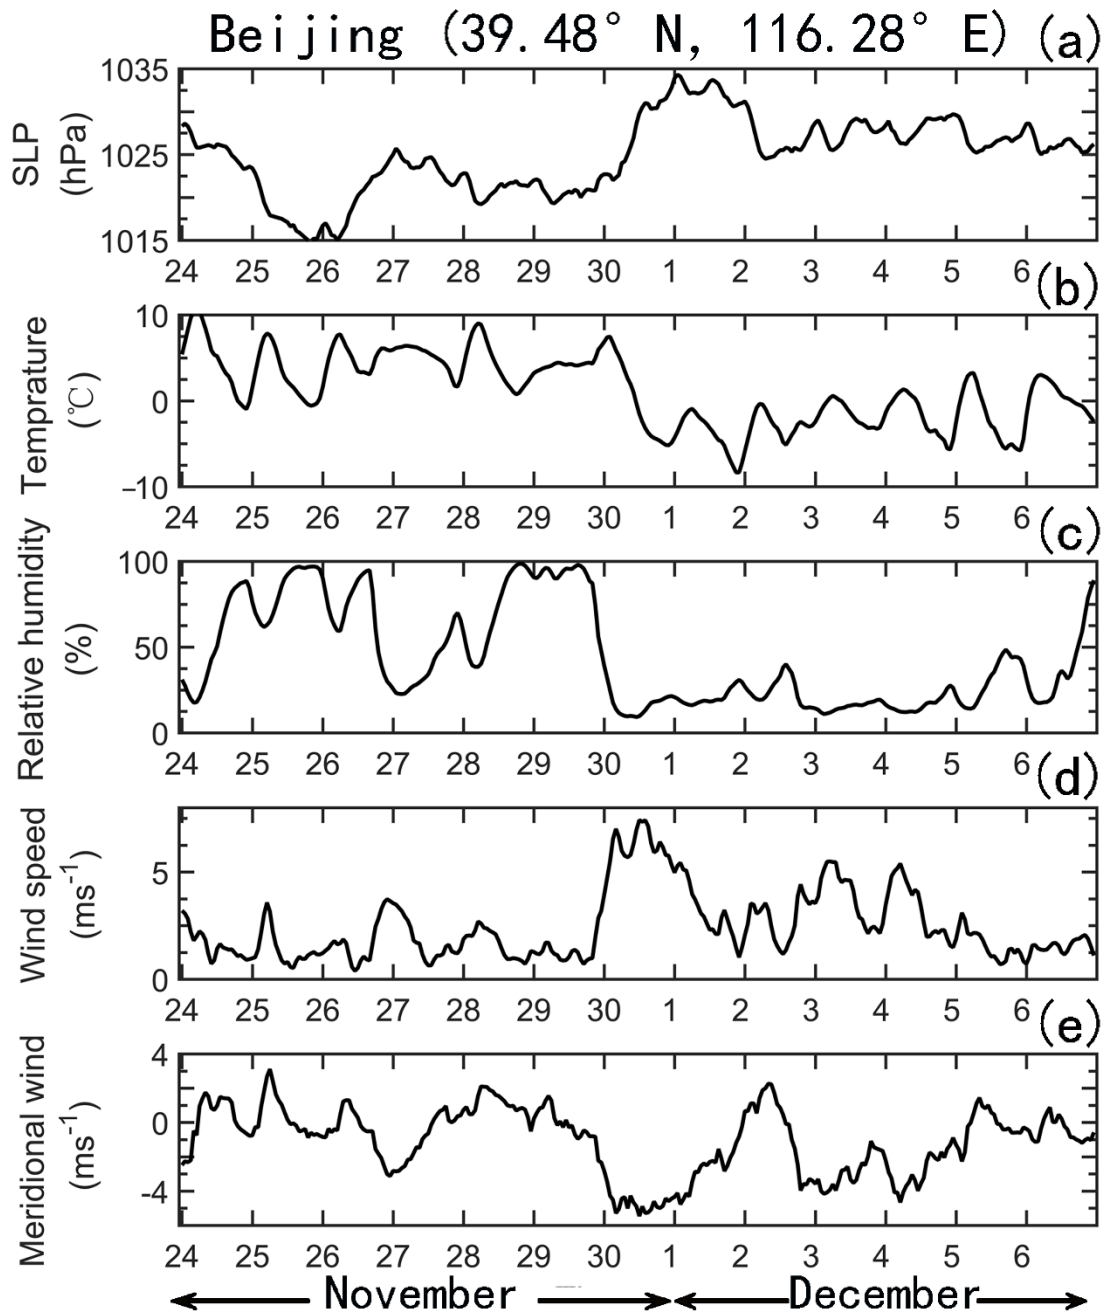

616

617 **Figure 3.** Time series of surface ( $\sim 1.2$  m above the surface) hourly meteorological

618 measurements of (a) sea level pressure, (b) temperature, (c) relative humidity, (d)

619 horizontal wind, and (e) meridional wind during the period 24 Nov.-6 Dec. 2014,

620 observed over the Beijing station ( $39.4^\circ$  N,  $116.2^\circ$  E, 31.3 m above sea level).

621

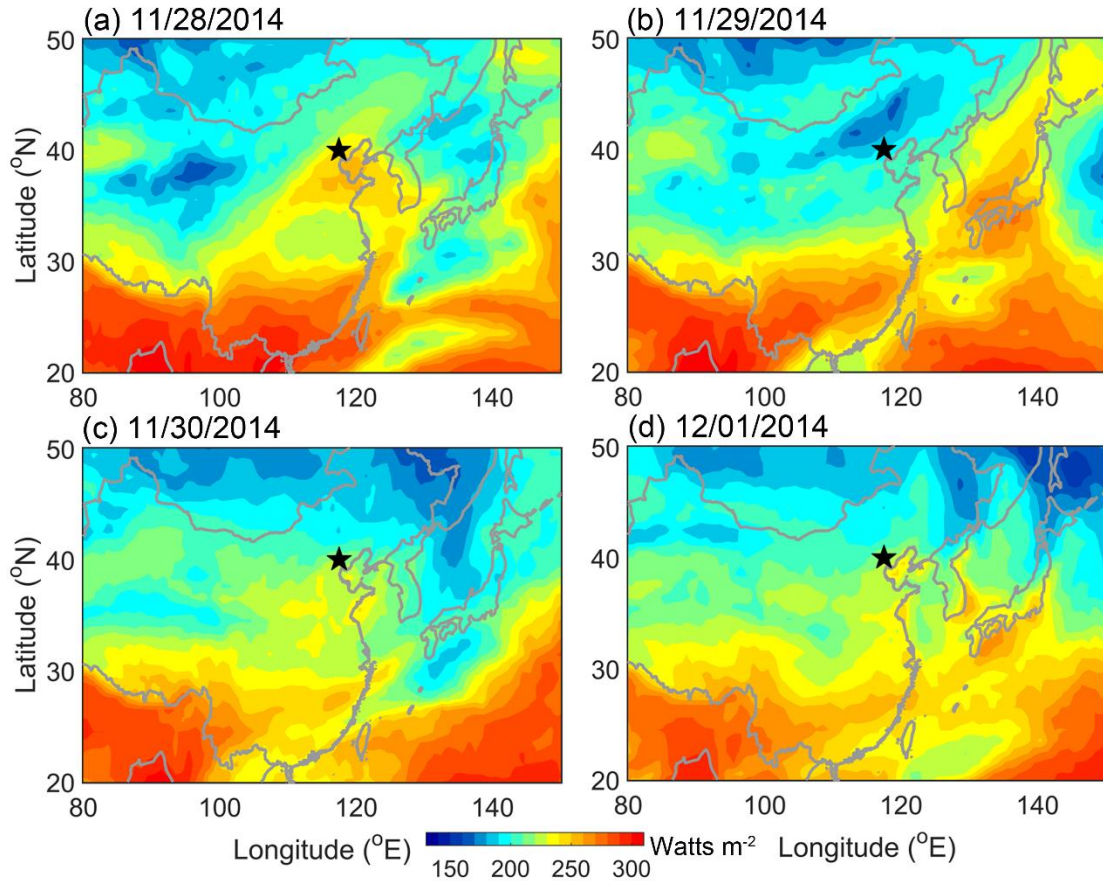

622

623 **Figure 4.** Contour maps of the high quality Climate Data Record (CDR) of the daily  
 624 Outgoing Longwave Radiation (OLR), derived from the NOAA high-resolution  
 625 infrared radiation sounder (HIRS) on (a) 28 Nov., (b) 29 Nov., (c) 30 Nov., and (d) 1  
 626 Dec. 2014. The black star shows the location of Xianghe.

627

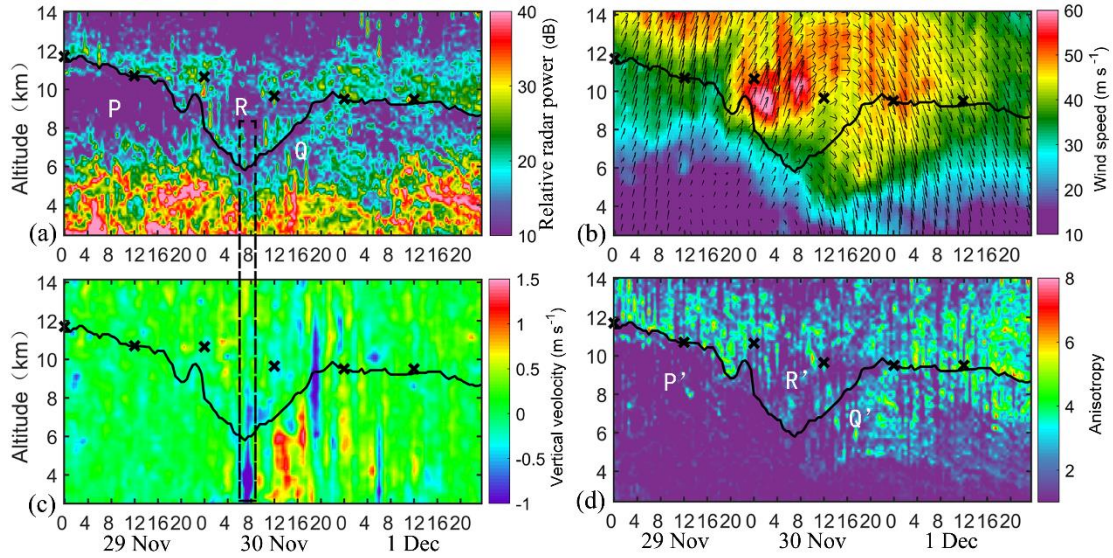

628

629 **Figure 5.** Altitude-time section of (a) the radar backscattered echo power in zenith  
 630 direction, (b) the horizontal wind speed along with wind vector, of which the up and  
 631 down arrows represent north and south respectively, and left-right is west-east, (c) the  
 632 vertical velocity, and (d) the aspect sensitivity, observed by the Beijing MST radar from  
 633 29 November to 1 December 2014. The black curve shows the radar-determined  
 634 tropopause, as defined in section 2.1. The dotted rectangle highlights the strong  
 635 downdrafts immediately preceding the rapid tropopause ascent. The positions of the  
 636 LRT tropopause heights, derived from the nearly simultaneous collocated GPS  
 637 radiosonde temperature profile, are marked by crosses.

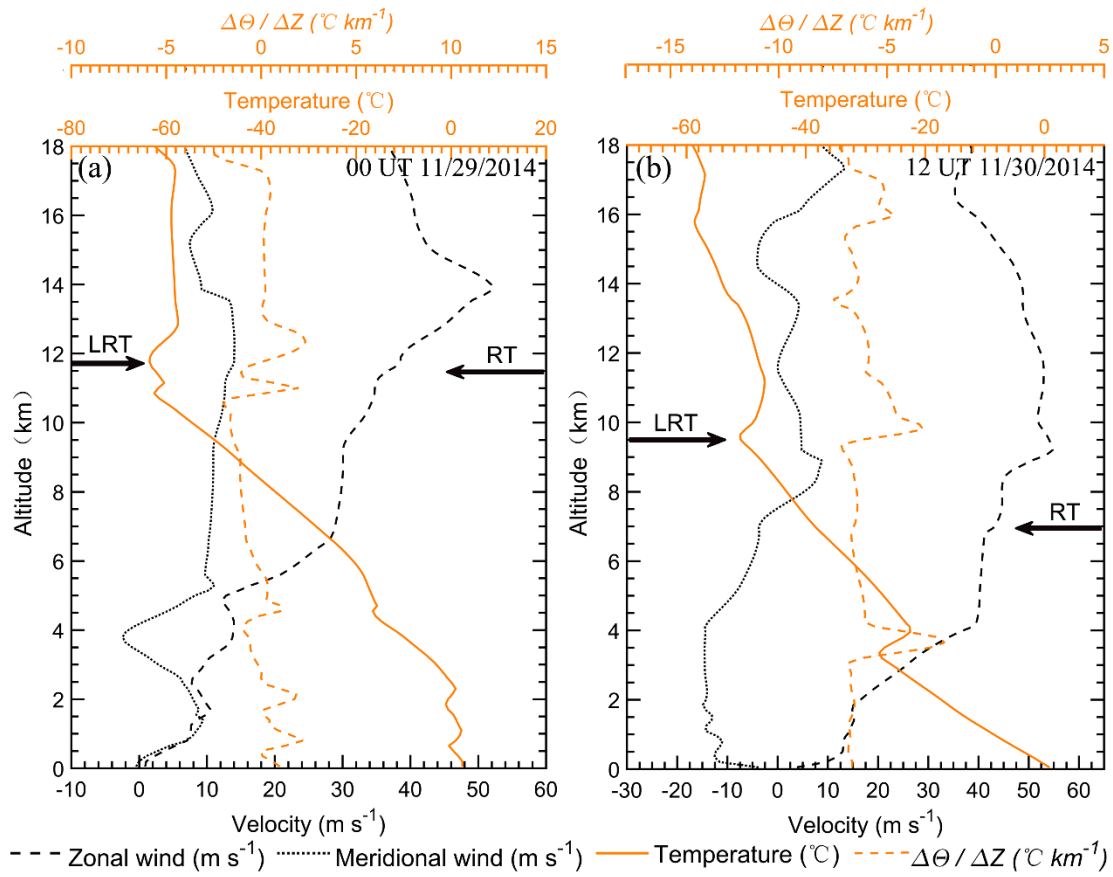

639 **Figure 6.** Vertical profiles of zonal wind, meridional wind, temperature, and potential  
 640 temperature gradient derived from the GPS radiosonde measurements, at (a) 0000 UTC  
 641 29 November 2014 and (b) 1200 UTC 30 November 2014. The bold arrows on the left  
 642 and right side of each panel indicate the radiosonde derived LRT tropopause and radar-  
 643 derived tropopause height, respectively.

644

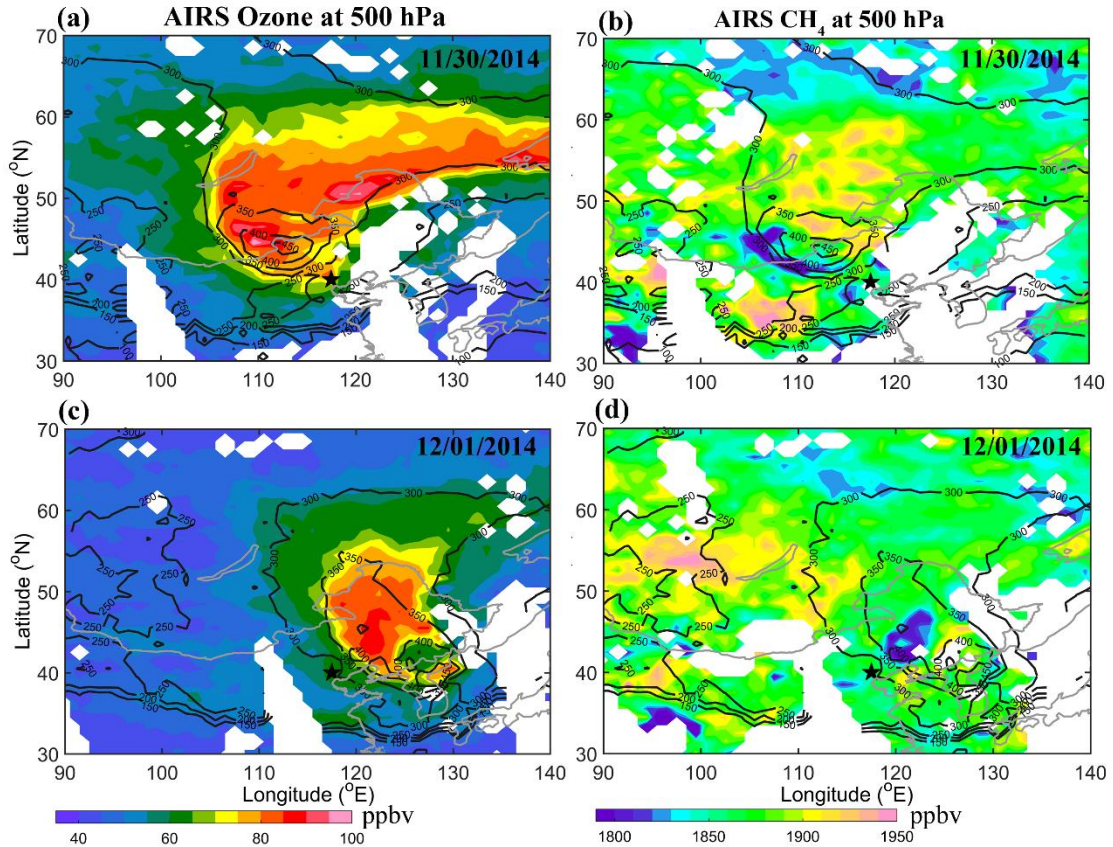

645

646 **Figure 7.** 500 hPa Ozone (left panels) and methane CH<sub>4</sub> (right panels) distribution

647 along with the tropopause height contour, derived from the AIRS satellite observations.

648 The top and bottom plots show the data of 30 Nov. 2014 and 1 Dec. 2014, respectively.

649 According to the Aqua Orbit Tracks (not shown), the time range of the satellite passage

650 is between ~04:00-07:25 on 30 November and between ~03:15-06:35 on 1 December

651 2014. The black star indicates the location of Xianghe.

652

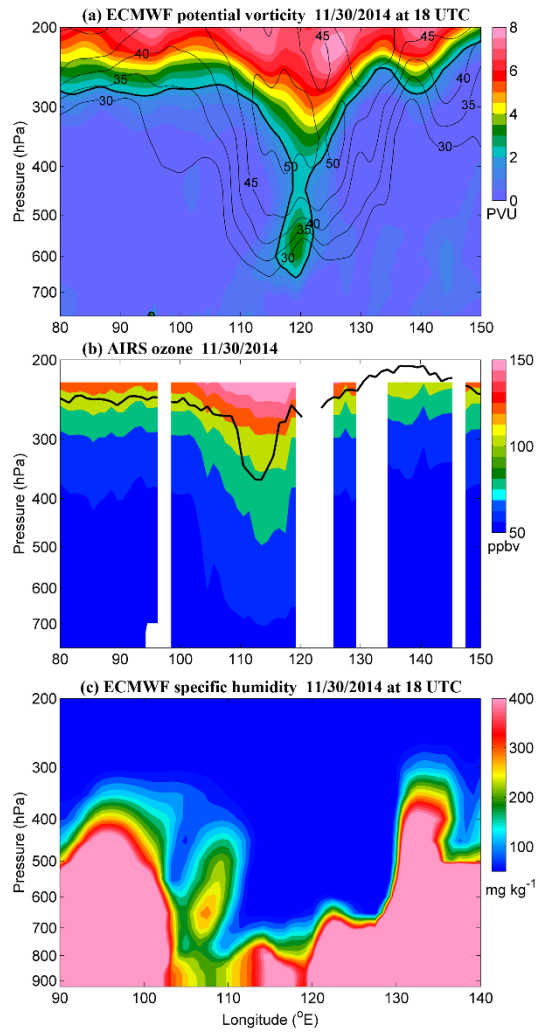

653

654 **Figure 8.** Longitude-pressure cross section of (a) ECMWF PV (colors, in pvu) along  
 655 with horizontal wind contour (thin black line, m/s) at 18 UTC on 30 Nov. 2014, (b)  
 656 AIRS ozone mixing ratio (colors, in ppbv) along with tropopause height (black line) on  
 657 30 Nov. 2014, and (c) ECMWF specific humidity (colors, in  $\text{mg kg}^{-1}$ ) at 18 UTC on 30  
 658 Nov. 2014, at a constant latitude  $40^\circ$  N (nearest grid point in the latitude of Xianghe).  
 659 The bold line in (a) marks the isotropic line of PV at 2 pvu.



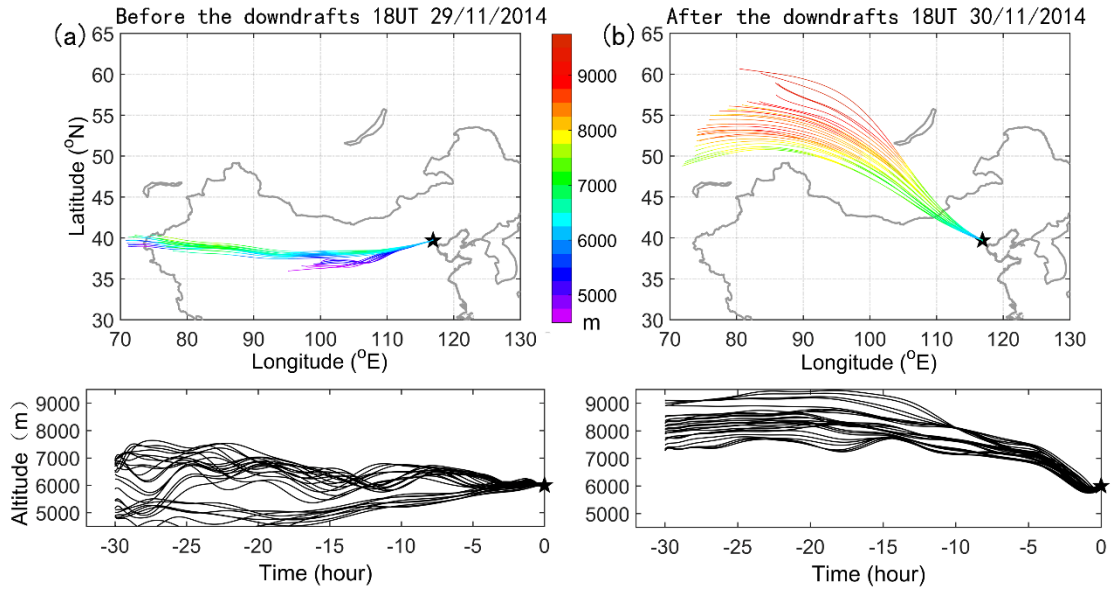

660

661 **Figure 9.** Illustration of 30 h three-dimensional backward trajectories ending at  
 662 Xianghe at 6000 m using National Oceanic Atmospheric Administration (NOAA)  
 663 HYSPLIT model: (a) before the main downdrafts at 18 UTC on 29 November 2014,  
 664 and (b) after the main downdrafts at 18 UTC on 30 November 2014. The HYSPLIT  
 665 ensemble consists of 27 trajectories. Upper plots show the horizontal projection of the  
 666 trajectories, and the lower plots show the corresponding time-height vertical  
 667 displacement of the trajectories.

668

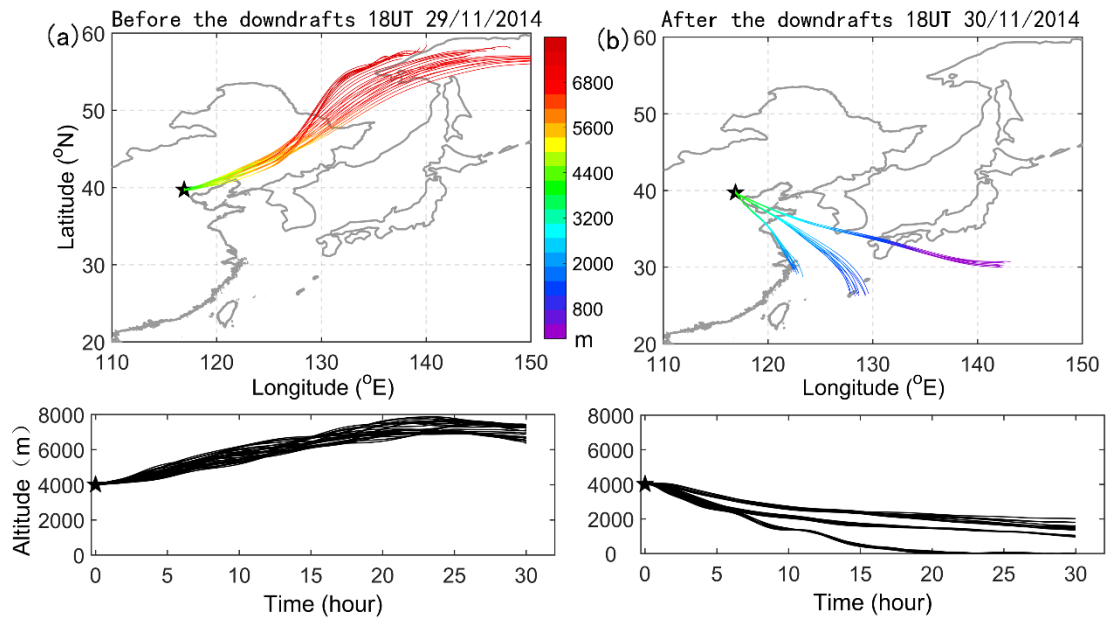

669

670 **Figure 10.** Same as Fig.10 but for three-dimensional forward trajectories starting at

671 Xianghe at 4000 m: (a) before the main downdrafts at 00 UTC on 30 November 2014,

672 and (b) after the main downdrafts at 00 UTC on 1 December 2014.

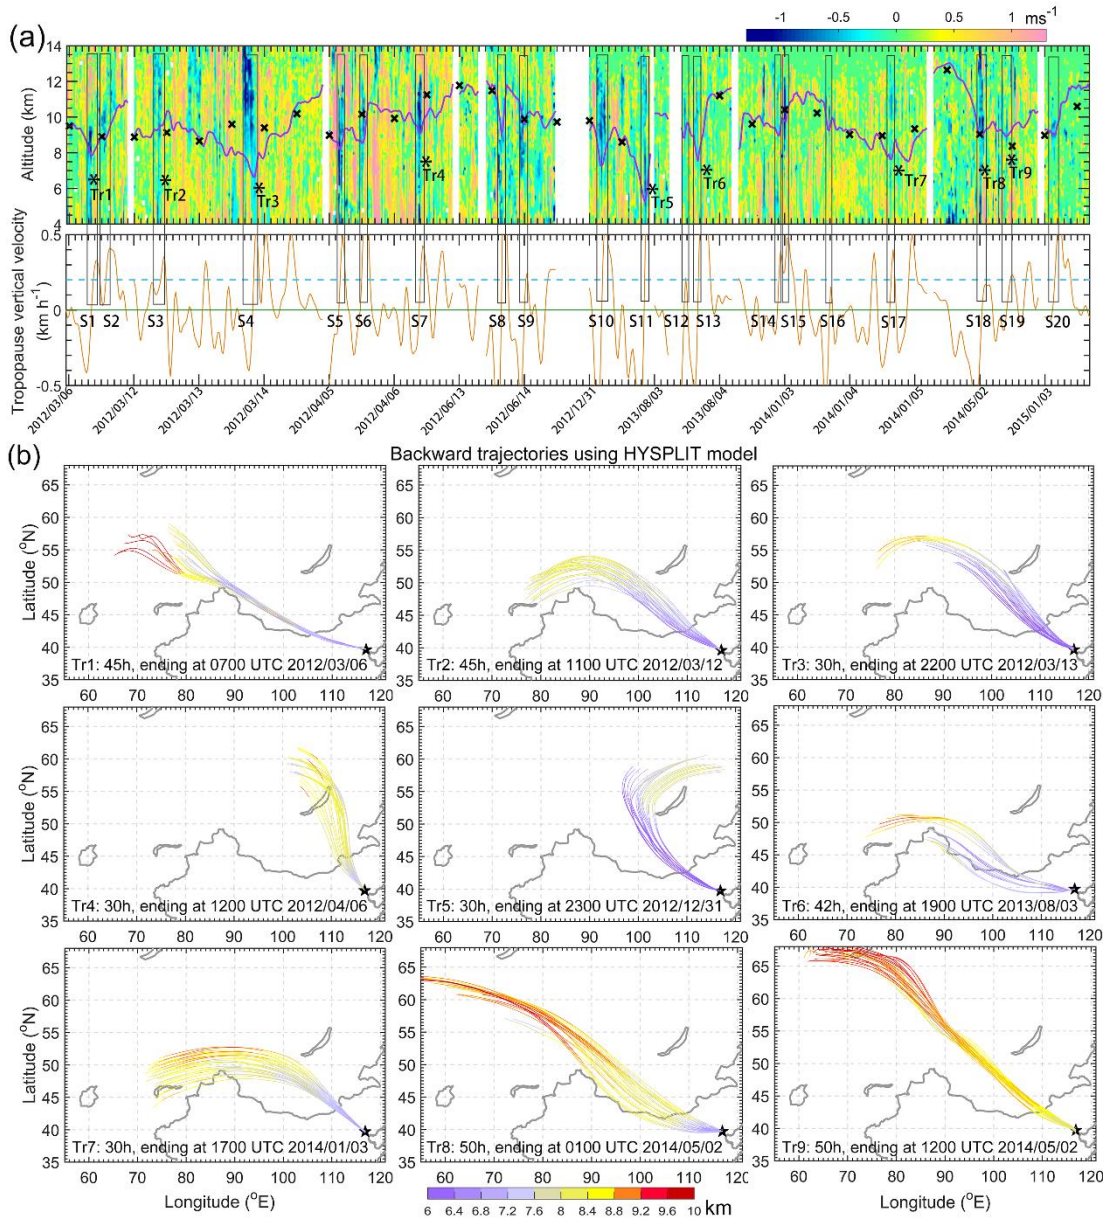

673

674 **Figure 11.** (a) Height-time section of several episodic observations of the radar-derived  
 675 vertical wind (colors in m/s) along with RT height (purple bold line) and LRT height  
 676 (bold crosses), between Mar. 2012 and Jan. 2015. The corresponding vertical velocity  
 677 of the RT (orange line) is plotted in the lower panel of (a), dotted blue line indicates the  
 678 value of 0.2 km/h. Dates for the observations are displayed as year/month/day. Black  
 679 rectangular boxes represent **the cases of strong downdraughts (absolute value  $\geq 0.5$  m/s)**  
 680 **preceding rapid tropopause ascent ( $>0.1$  km h<sup>-1</sup>) and are labeled as S1, S2, S3..., S20.**

681 Symbol ‘\*’ labeled as Tr1-Tr9 indicates the ending point of the corresponding  
682 trajectories in Fig.12b. (b) Results of backward trajectories (colors in km) of the typical  
683 9 selecting cases from Fig.12a, providing the signature and source of possible  
684 stratospheric intrusions.  
685

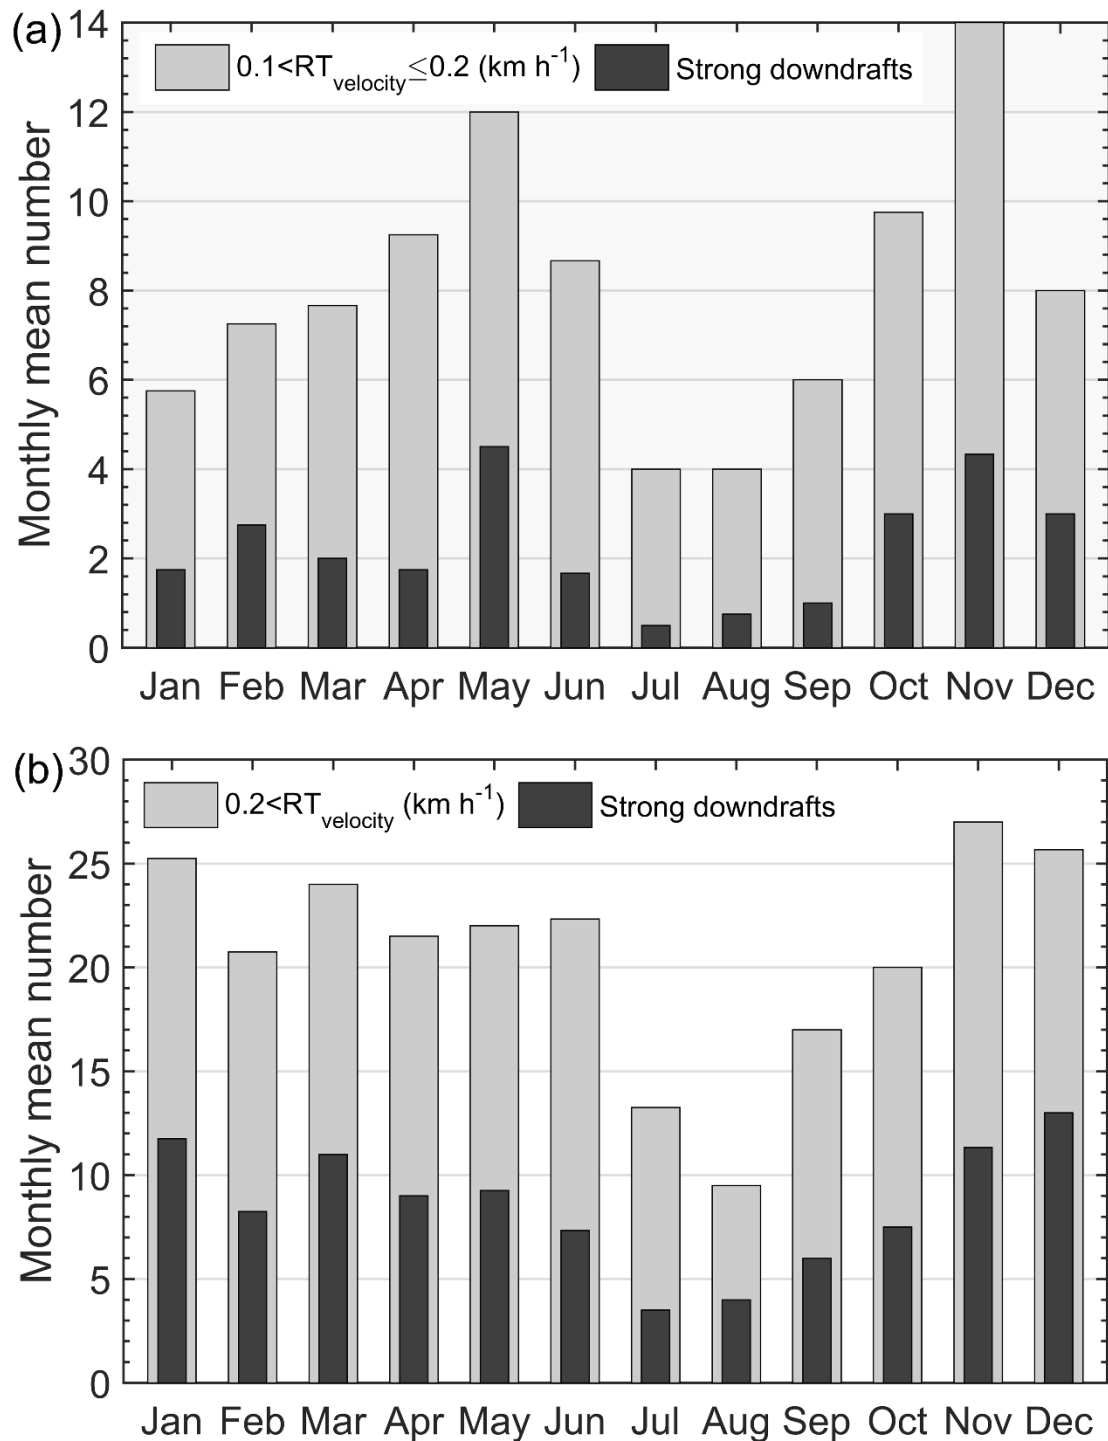

686

687 **Figure 12.** Four years (2012-2015) of radar-determined monthly mean number of rapid

688 tropopause ascent (gray bands) and the corresponding strong downdrafts just preceding

689 the rapid tropopause ascent (black bands). (a) Gray bands: with the ascent by at least

690 0.6 km and the excursion velocity is between 0.1-0.2 km h<sup>-1</sup>; black bands: except for

691 the criteria of gray bands, strong downdrafts occurred preceding the rapid RT ascent

692 must exceed  $0.5 \text{ m s}^{-1}$  and pass through the RT layer. (b) Same as (a) but for the  
693 occasions when the ascent velocity is larger than  $0.2 \text{ km h}^{-1}$ . According to the study  
694 here, the black bands in the histogram well represent the occurrence of possible  
695 stratospheric intrusions.
